# Supplementary material for: Consumption of meat in relation to physical functioning in the Seniors-ENRICA cohort
Source: Springer Nature journal article supplement (doi:10.1186/s12916-018-1036-4), 2018-04-05
Supplement: MOESM1 [file 15593848]

## ADDITIONAL TABLE

Additional table 1. HR and 95% CI for the association between meat consumption and impairment in mobility.

|                                          | Meat intake |                   |                   | P-trend | Continuous<br>per 100 g/d |
|------------------------------------------|-------------|-------------------|-------------------|---------|---------------------------|
|                                          | Tertile 1   | Tertile 2         | Tertile 3         |         |                           |
| N participants                           | 893         | 894               | 894               |         | 2681                      |
| <b>Processed meat</b>                    |             |                   |                   |         |                           |
| Mean intake, g/d                         | 8.5 ± 5.9   | 27.9 ± 6.0        | 69.6 ± 38.0       |         | 35.3 ± 34.0               |
| Impairment in agility,<br>n/person-years | 148/4,429   | 165/4,652         | 142/4,661         |         | 455/13,742                |
| Model 1                                  | Reference   | 1.09 (0.88; 1.37) | 1.11 (0.88; 1.41) | 0.36    | 1.01 (0.76; 1.35)         |
| Model 2                                  | Reference   | 1.11 (0.88; 1.38) | 1.03 (0.81; 1.31) | 0.80    | 0.92 (0.68; 1.25)         |
| Model 3                                  | Reference   | 1.12 (0.89; 1.41) | 1.04 (0.81; 1.33) | 0.76    | 0.92 (0.67; 1.25)         |
| <b>Red meat</b>                          |             |                   |                   |         |                           |
| Mean intake, g/d                         | 7.5 ± 5.4   | 26.3 ± 5.9        | 63.8 ± 27.4       |         | 32.5 ± 28.6               |
| Impairment in agility,<br>n/person-years | 165/4,536   | 173/4,614         | 117/4,593         |         | 455/13,742                |
| Model 1                                  | Reference   | 1.19 (0.96; 1.48) | 1.01 (0.79; 1.29) | 0.81    | 0.93 (0.63; 1.38)         |
| Model 2                                  | Reference   | 1.28 (1.02; 1.59) | 1.11 (0.86; 1.43) | 0.31    | 1.01 (0.68; 1.50)         |
| Model 3                                  | Reference   | 1.25 (1.00; 1.57) | 1.10 (0.85; 1.42) | 0.39    | 1.00 (0.67; 1.49)         |
| <b>Poultry</b>                           |             |                   |                   |         |                           |
| Mean intake, g/d                         | 9.0 ± 6.6   | 28.5 ± 5.4        | 64.2 ± 28.6       |         | 33.9 ± 28.6               |
| Impairment in agility,<br>n/person-years | 144/4,485   | 159/4,655         | 152/4,601         |         | 455/13,742                |
| Model 1                                  | Reference   | 1.11 (0.89; 1.40) | 1.12 (0.89; 1.40) | 0.35    | 1.15 (0.82; 1.61)         |
| Model 2                                  | Reference   | 1.10 (0.88; 1.38) | 1.09 (0.87; 1.38) | 0.45    | 1.06 (0.76; 1.50)         |
| Model 3                                  | Reference   | 1.13 (0.90; 1.43) | 1.11 (0.87; 1.40) | 0.40    | 1.08 (0.76; 1.53)         |

Model 1: adjusted for age and sex

Model 2: adjusted for age, sex, educational level (≤primary, secondary, university), smoking status (never smoker, former smoker, current smoker), alcohol intake (quintiles of g/d), energy intake (quintiles of kcal/d), BMI (<25, 25-<30, ≥30 kg/m<sup>2</sup>), sedentary behaviour (quintiles of h/wk watching TV) and morbidity (cognitive impairment, osteomuscular disease, cardiovascular disease, cancer, chronic lung disease, and depression).

Model 3: additionally adjusted for vegetables, legumes, fruits, nuts, cereals, dairy, and fish consumption (quintiles of g/d).
